# Supplementary material
Source: PubMed Central journal article supplement (PMC5914006)
Supplement: AAC.02311-17_zac004187022s1.pdf [file AAC.02311-17_zac004187022s1.pdf]

Figure S1: Observed plasma concentration versus (hours) (A: normal scale, B: log-normal scale). Time after dose could be up to 60 hours as some patients only received benzylpenicillin for 2 days, after which it was discontinued while samples were still drawn according to protocol on following study days.

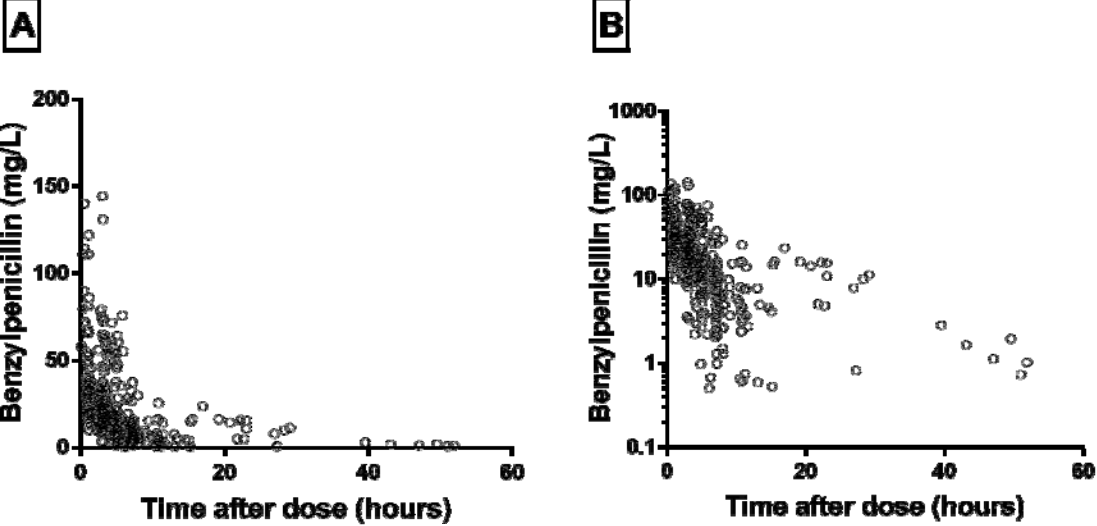

Figure S2: Visual predictive check of the system-specific model (A) and the reference-model (B) with observed benzylpenicillin concentrations (blue circles) and population prediction (red solid line) with the corresponding 95% prediction interval (dotted red lines). Pink and blue fields represent the model-based percentile confidence interval.

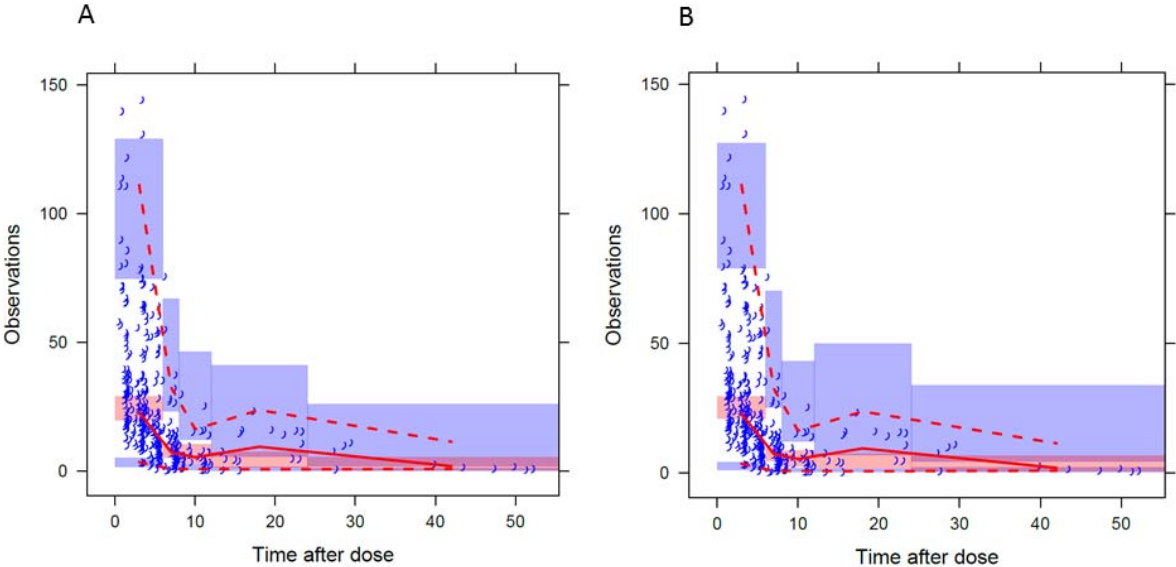

Figure S3: individual post hoc benzylpenicillin clearances (Cl, red circle) and population predicted benzylpenicillin clearances (TVCL; black triangle) versus the most predictive covariate (postnatal age, PNA) for the system-specific model (A) and the reference-model (B).

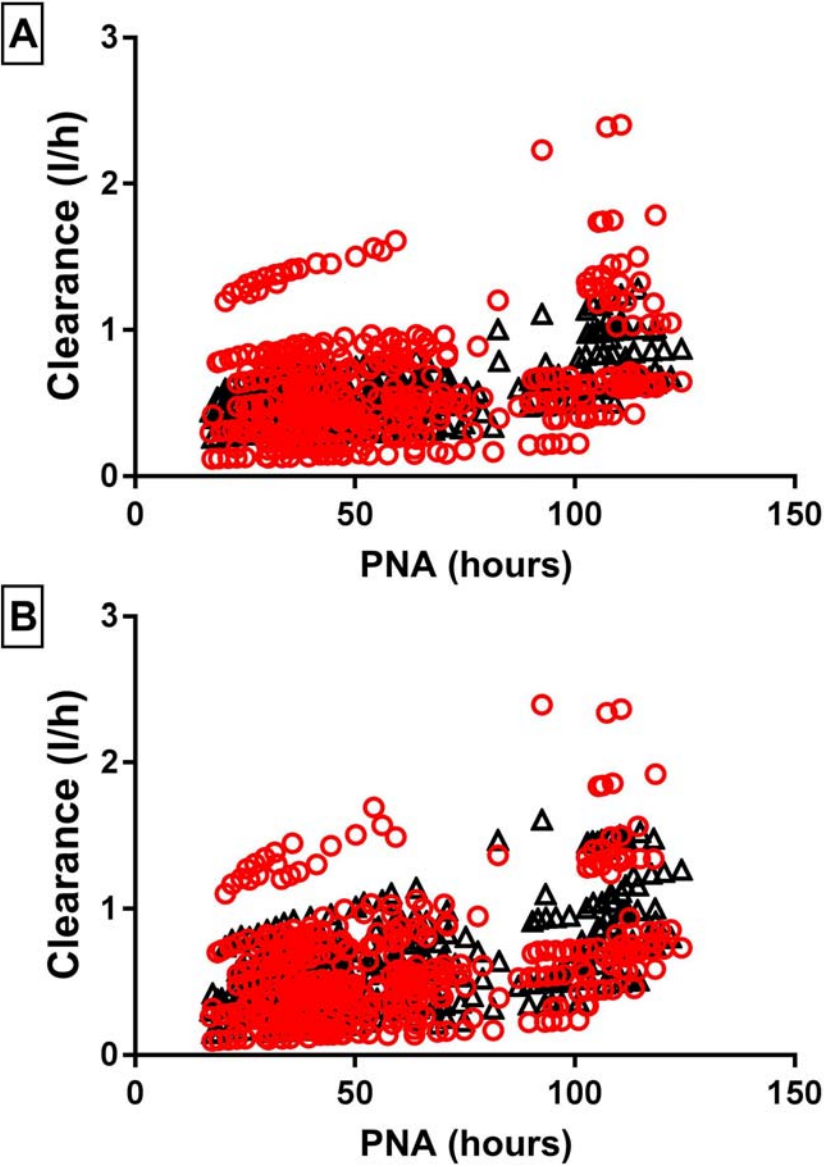

Table S1: Simulated trough and peak concentrations based on the system-specific model.

| Dosage regimen               | GA | UO  | Level | Median concentration (mg/L) | 5 <sup>th</sup> percentile (mg/L) | 95 <sup>th</sup> percentile (mg/L) |
|------------------------------|----|-----|-------|-----------------------------|-----------------------------------|------------------------------------|
| 75,000 IU/kg/day in 3 doses  | 36 | 0.5 | T     | 7.6                         | 1.3                               | 22.5                               |
|                              |    |     | P     | 25.8                        | 12.5                              | 50.0                               |
|                              |    | 2   | T     | 6.3                         | 1.0                               | 19.6                               |
|                              |    |     | P     | 24.2                        | 11.7                              | 46.9                               |
|                              |    | 6   | T     | 5.3                         | 0.8                               | 17.6                               |
|                              |    |     | P     | 23.0                        | 11.2                              | 44.7                               |
|                              | 38 | 0.5 | T     | 5.8                         | 0.9                               | 18.6                               |
|                              |    |     | P     | 23.6                        | 11.5                              | 46.0                               |
|                              |    | 2   | T     | 4.7                         | 0.6                               | 16.1                               |
|                              |    |     | P     | 22.1                        | 10.8                              | 43.2                               |
|                              |    | 6   | T     | 3.9                         | 0.5                               | 14.4                               |
|                              |    |     | P     | 21.0                        | 10.2                              | 41.2                               |
|                              | 40 | 0.5 | T     | 4.2                         | 0.5                               | 14.9                               |
|                              |    |     | P     | 21.4                        | 10.4                              | 41.9                               |
|                              |    | 2   | T     | 3.3                         | 0.4                               | 12.8                               |
|                              |    |     | P     | 20.1                        | 9.8                               | 39.6                               |
|                              |    | 6   | T     | 2.7                         | 0.3                               | 11.4                               |
|                              |    |     | P     | 19.0                        | 9.2                               | 37.8                               |
|                              | 42 | 0.5 | T     | 2.9                         | 0.3                               | 11.9                               |
|                              |    |     | P     | 19.4                        | 9.4                               | 38.4                               |
|                              |    | 2   | T     | 2.2                         | 0.3                               | 10.2                               |
|                              |    |     | P     | 18.2                        | 8.7                               | 36.2                               |
|                              |    | 6   | T     | 1.8                         | 0.2                               | 8.9                                |
|                              |    |     | P     | 17.2                        | 8.2                               | 34.5                               |
| 150,000 IU/kg/day in 3 doses | 36 | 0.5 | T     | 15.2                        | 2.6                               | 45.0                               |
|                              |    |     | P     | 51.6                        | 25.0                              | 100.1                              |
|                              |    | 2   | T     | 12.5                        | 2.0                               | 39.3                               |
|                              |    |     | P     | 48.3                        | 23.4                              | 93.9                               |
|                              |    | 6   | T     | 10.7                        | 1.5                               | 35.2                               |
|                              |    |     | P     | 45.9                        | 22.3                              | 89.4                               |
|                              | 38 | 0.5 | T     | 11.6                        | 1.7                               | 37.2                               |
|                              |    |     | P     | 47.2                        | 22.9                              | 92.0                               |
|                              |    | 2   | T     | 9.4                         | 1.3                               | 32.3                               |
|                              |    |     | P     | 44.3                        | 21.5                              | 86.4                               |
|                              |    | 6   | T     | 7.9                         | 1.0                               | 28.8                               |
|                              |    |     | P     | 42.1                        | 20.4                              | 82.5                               |
|                              | 40 | 0.5 | T     | 4.2                         | 0.5                               | 14.9                               |
|                              |    |     | P     | 21.4                        | 10.4                              | 41.9                               |
|                              |    | 2   | T     | 3.3                         | 0.4                               | 12.8                               |
|                              |    |     | P     | 20.1                        | 9.8                               | 39.6                               |
|                              |    | 6   | T     | 2.7                         | 0.3                               | 11.4                               |
|                              |    |     | P     | 19.0                        | 9.2                               | 37.8                               |

|                                    |     |     |      |      |      |       |
|------------------------------------|-----|-----|------|------|------|-------|
| 200,000<br>IU/kg/day<br>in 4 doses | 42  | 0.5 | T    | 5.8  | 0.7  | 23.8  |
|                                    |     |     | P    | 38.8 | 18.8 | 76.8  |
|                                    |     | 2   | T    | 4.5  | 0.5  | 20.3  |
|                                    |     |     | P    | 36.3 | 17.4 | 72.4  |
|                                    |     | 6   | T    | 3.6  | 0.4  | 17.8  |
|                                    |     |     | P    | 34.5 | 16.3 | 69.0  |
|                                    | 36  | 0.5 | T    | 24.3 | 5.6  | 64.1  |
|                                    |     |     | P    | 59.0 | 28.5 | 116.8 |
|                                    |     | 2   | T    | 20.5 | 4.3  | 56.5  |
|                                    |     |     | P    | 54.8 | 26.5 | 108.6 |
|                                    |     | 6   | T    | 17.8 | 3.5  | 51.2  |
|                                    |     |     | P    | 51.7 | 25.0 | 102.5 |
|                                    | 38  | 0.5 | T    | 19.2 | 3.9  | 54.0  |
|                                    |     |     | P    | 53.4 | 25.8 | 105.8 |
|                                    |     | 2   | T    | 16.0 | 2.9  | 47.4  |
|                                    |     |     | P    | 49.5 | 24.0 | 98.5  |
|                                    |     | 6   | T    | 13.7 | 2.3  | 42.5  |
|                                    |     |     | P    | 46.7 | 22.6 | 93.2  |
|                                    | 40  | 0.5 | T    | 14.5 | 2.4  | 44.1  |
|                                    |     |     | P    | 47.7 | 23.1 | 95.0  |
|                                    |     | 2   | T    | 11.8 | 1.8  | 38.5  |
|                                    |     |     | P    | 44.3 | 21.4 | 88.5  |
|                                    |     | 6   | T    | 10.0 | 1.4  | 34.3  |
|                                    |     |     | P    | 41.8 | 20.1 | 83.6  |
| 42                                 | 0.5 | T   | 10.6 | 1.5  | 35.8 |       |
|                                    |     | P   | 42.7 | 20.6 | 85.5 |       |
|                                    | 2   | T   | 8.5  | 1.1  | 30.9 |       |
|                                    |     | P   | 39.7 | 19.0 | 79.6 |       |
|                                    | 6   | T   | 7.1  | 0.8  | 27.5 |       |
|                                    |     | P   | 37.3 | 17.8 | 75.3 |       |

GA = gestational age (weeks), UO = urine output (ml/kg/hour), T = trough, P = peak. Grey cells indicate levels >100 mg/L
